# Supplementary material
Source: HighWire-hosted journal article supplement (https://www.cmaj.ca/highwire/filestream/81430/field_highwire_adjunct_files/5/211416-res-6-at.pdf)
Supplement: 211416-res-6-at.pdf [file 211416-res-6-at.pdf]

## Appendix 6: Sensitivity Analysis by Methodological Quality

| Category of Care |                         | Inappropriate Use (Total)                                      |                            |                 | Underuse                |                            |                 | Overuse                 |                            |                 |
|------------------|-------------------------|----------------------------------------------------------------|----------------------------|-----------------|-------------------------|----------------------------|-----------------|-------------------------|----------------------------|-----------------|
|                  |                         | N<br>Total<br>Practices<br>(Unique<br>Practices <sup>a</sup> ) | N<br>Studies<br>(Findings) | Median<br>(IQR) | N<br>Total<br>Practices | N<br>Studies<br>(Findings) | Median<br>(IQR) | N<br>Total<br>Practices | N<br>Studies<br>(Findings) | Median<br>(IQR) |
| Diagnostics      | All Studies             | 134 (120)                                                      | 89 (258)                   | 28% (13%-50%)   | 78                      | 52 (163)                   | 35% (21%-62%)   | 56                      | 42 (95)                    | 13% (3%-28%)    |
|                  | Weak Studies<br>Removed | 105 (97)                                                       | 63 (203)                   | 28% (12%-51%)   | 58                      | 37 (128)                   | 36% (23%-64%)   | 47                      | 29 (75)                    | 11% (3%-28%)    |
| Therapeutics     | All Studies             | 119 (108)                                                      | 108 (249)                  | 34% (10%-61%)   | 66                      | 60 (138)                   | 51% (30%-71%)   | 53                      | 55 (111)                   | 14% (3%-39%)    |
|                  | Weak Studies<br>Removed | 104 (96)                                                       | 80 (192)                   | 32% (8%-59%)    | 52                      | 43 (96)                    | 51% (27%-71%)   | 52                      | 43 (96)                    | 12% (2%-36%)    |
| Total            | All Studies             | 253 (228)                                                      | 174 (507)                  | 30% (12%-57%)   | 144                     | 94 (301)                   | 44% (24%-66%)   | 109                     | 95 (206)                   | 14% (3%-31%)    |
|                  | Weak Studies<br>Removed | 209 (192)                                                      | 127 (395)                  | 29% (10%-55%)   | 110                     | 67 (224)                   | 43% (23%-66%)   | 99                      | 71 (171)                   | 11% (3%-31%)    |

### Legend

<sup>a</sup>=Unique Practices = Excludes practices that are both underused and overused (n=25)
